# Supplementary material for: Days alive and at home after hip fracture: a cross-sectional validation of a patient-centred outcome measure using routinely collected data
Source: PubMed Central journal article supplement — BMJ Qual Saf. 2021 Jul 30;32(9):546–56. doi: 10.1136/bmjqs-2021-013150 (PMC10447366; doi:10.1136/bmjqs-2021-013150), 2021-07-30
Supplement: bmjqs-2021-013150supp001.pdf [file bmjqs-2021-013150supp001.pdf]

## Appendices

**Figure 1 – Histogram of days alive at home (DAH) in the 30, 90 and 365 days after hip fracture admission**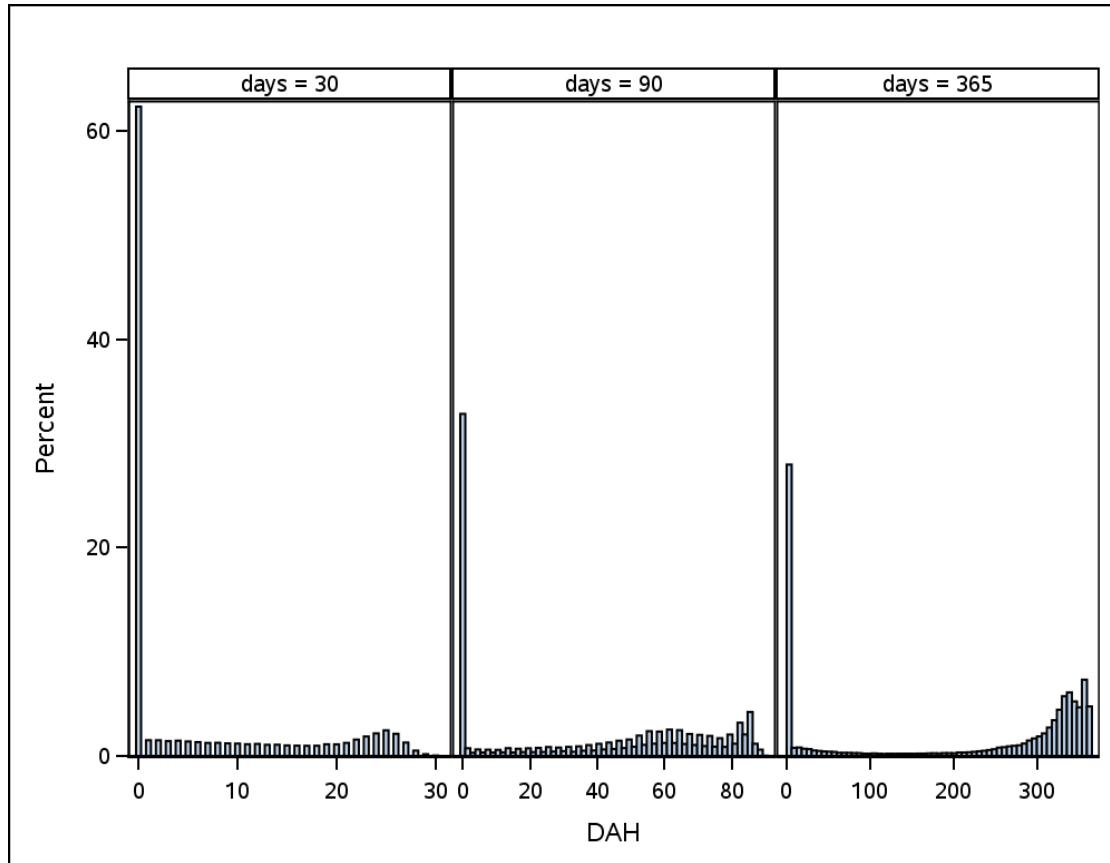

**Table 1** – Unadjusted associations of patient factors with days alive at home within 90 days of admission

|                                           | <b>Absolute<br/>median<br/>difference</b> | <b>LCrL</b> | <b>UCrL</b> |
|-------------------------------------------|-------------------------------------------|-------------|-------------|
| Age 60 to 69                              | -9.03                                     | -10.20      | -7.95       |
| Age 70 to 79                              | -22.21                                    | -23.36      | -21.19      |
| Age 80 to 89                              | -46.26                                    | -47.40      | -45.21      |
| Age 90+                                   | -77.20                                    | -78.49      | -75.99      |
| Acute hospitalization<br>in previous year | -24.51                                    | -25.41      | -23.65      |
| Dementia                                  | -50.18                                    | -50.67      | -49.95      |
| Frailty (mild)                            | -28.78                                    | -29.38      | -28.03      |
| Frailty (moderate)                        | -61.90                                    | -62.12      | -61.57      |
| Frailty (severe)                          | -61.89                                    | -62.12      | -61.54      |
| Income quintile 2                         | 3.68                                      | 2.51        | 4.85        |
| Income quintile 3                         | 4.49                                      | 3.31        | 5.72        |
| Income quintile 4                         | 5.87                                      | 4.71        | 7.11        |
| Income quintile 5                         | 8.10                                      | 6.99        | 9.27        |
| Male                                      | -2.15                                     | -3.04       | -1.24       |
| Multimorbidity                            | -15.90                                    | -16.59      | -15.12      |
| Multimorbidity+                           | -42.47                                    | -43.47      | -41.40      |
| Rural residence                           | 8.54                                      | 7.56        | 9.51        |

**Table 2** - Adjusted associations of patient factors with days alive at home within 90 days of admission

|                                           | <b>Absolute<br/>median<br/>difference</b> | <b>LCrL</b> | <b>UCrL</b> |
|-------------------------------------------|-------------------------------------------|-------------|-------------|
| Age 60 to 69                              | -2.98                                     | -3.78       | -2.18       |
| Age 70 to 79                              | -14.58                                    | -15.37      | -13.80      |
| Age 80 to 89                              | -30.19                                    | -30.90      | -29.51      |
| Age 90+                                   | -41.81                                    | -42.64      | -40.96      |
| Frailty (mild)                            | -20.44                                    | -21.10      | -19.78      |
| Frailty (moderate)                        | -31.85                                    | -32.72      | -30.93      |
| Frailty (severe)                          | -32.26                                    | -33.32      | -31.25      |
| Multimorbidity                            | -2.42                                     | -3.02       | -1.85       |
| Multimorbidity+                           | -2.53                                     | -3.25       | -1.88       |
| Acute hospitalization<br>in previous year | -0.33                                     | -0.73       | 0.03        |
| Dementia                                  | -19.23                                    | -19.88      | -18.59      |
| Male                                      | -0.85                                     | -1.27       | -0.47       |
| Rural Residence                           | 1.53                                      | 0.91        | 2.19        |
| Income quintile 2                         | 0.98                                      | 0.45        | 1.54        |
| Income quintile 3                         | 0.31                                      | -0.16       | 0.84        |
| Income quintile 4                         | -0.01                                     | -0.46       | 0.43        |
| Income quintile 5                         | 0.24                                      | -0.25       | 0.76        |

**Table 3** – Markov Chain Monte Carlo diagnostics for fully adjusted model

Trace plots

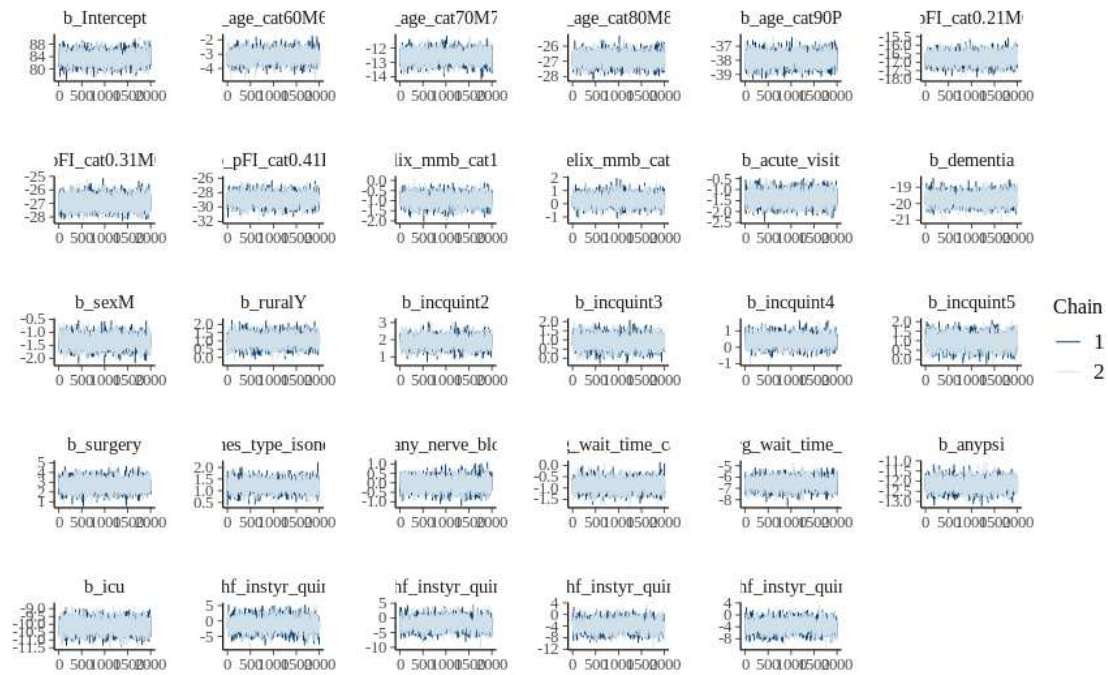

## Autocorrelation plots

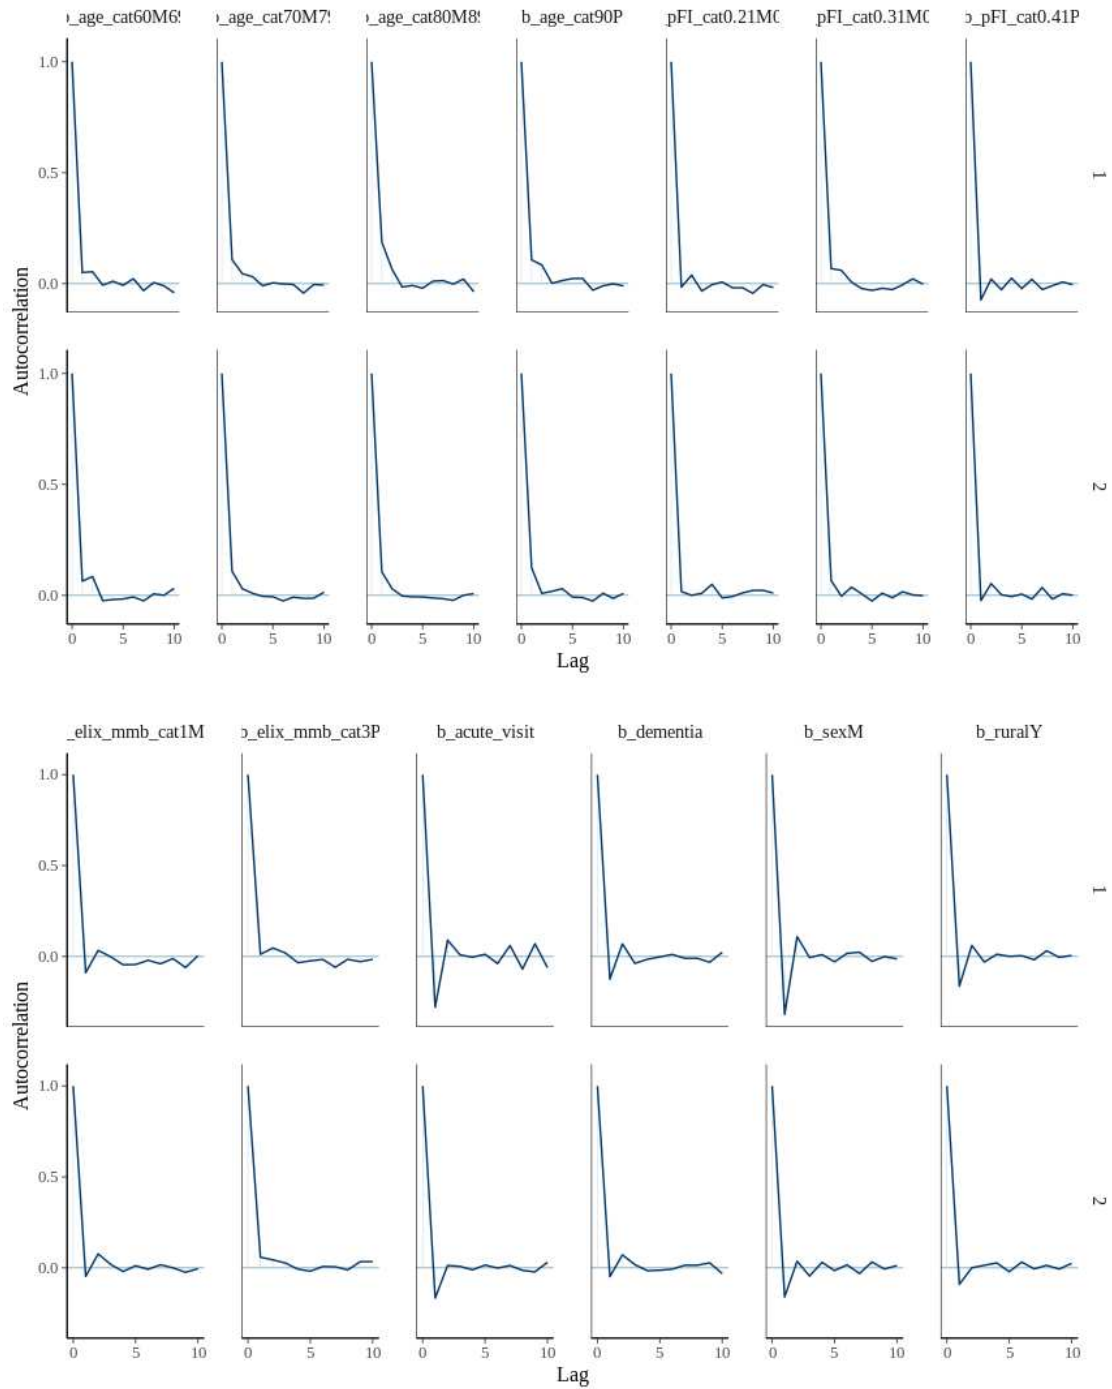

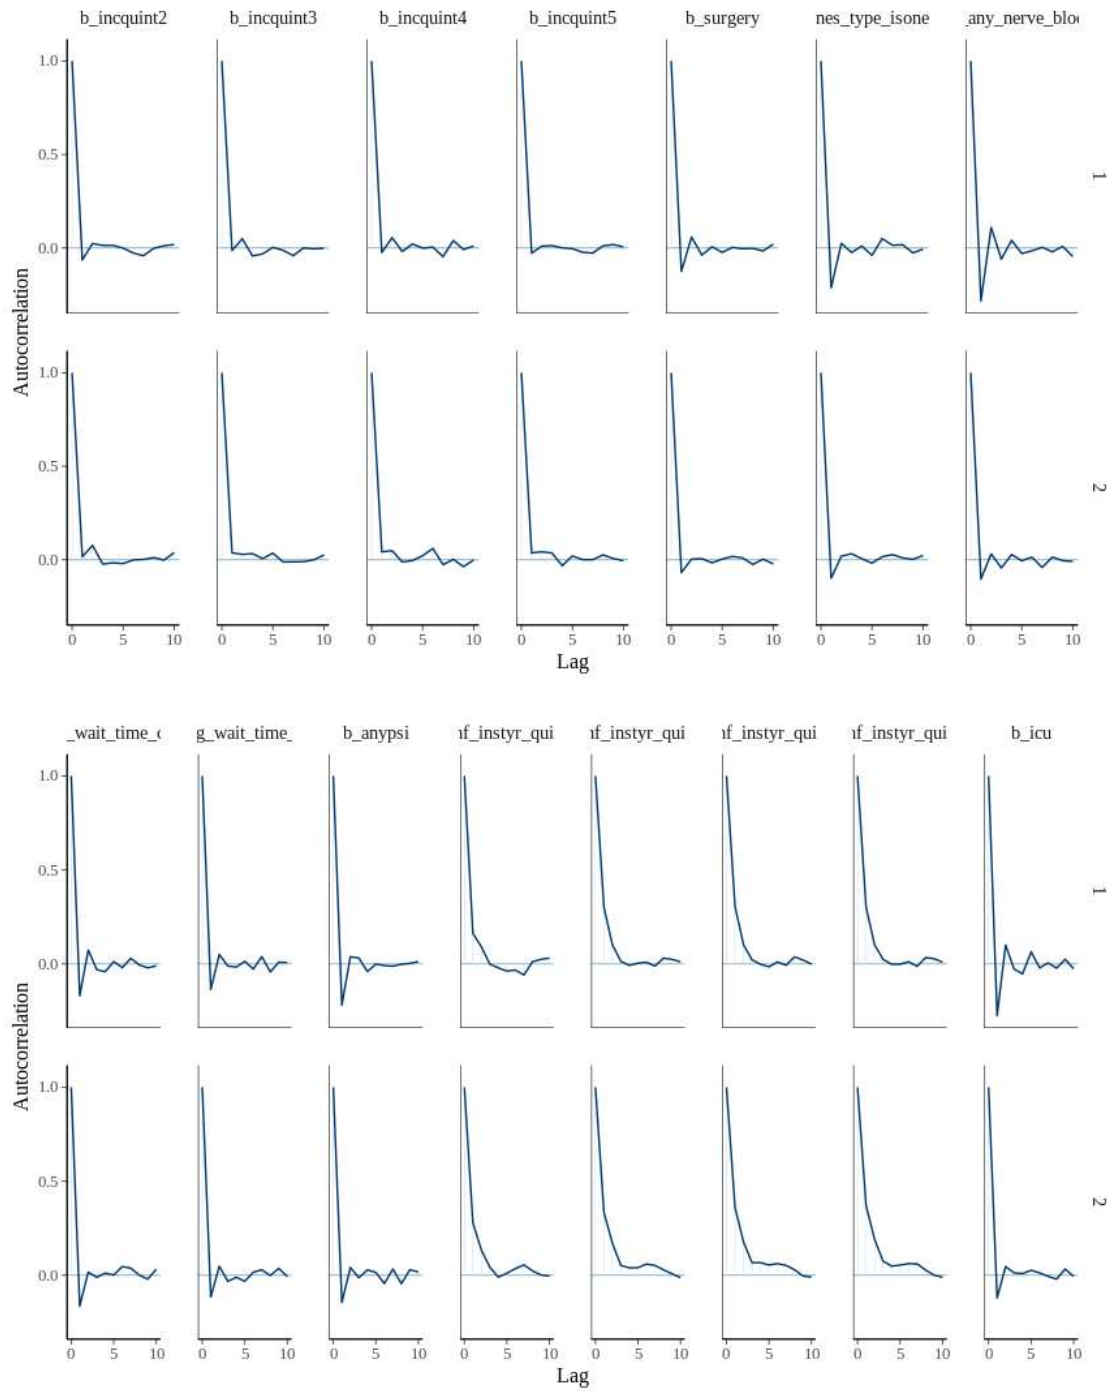

Rhat values (optimal=1.00, which evaluates convergence of Markov Chains by comparing between- and within-chain variances for each parameter; larger values indicate non-convergence)

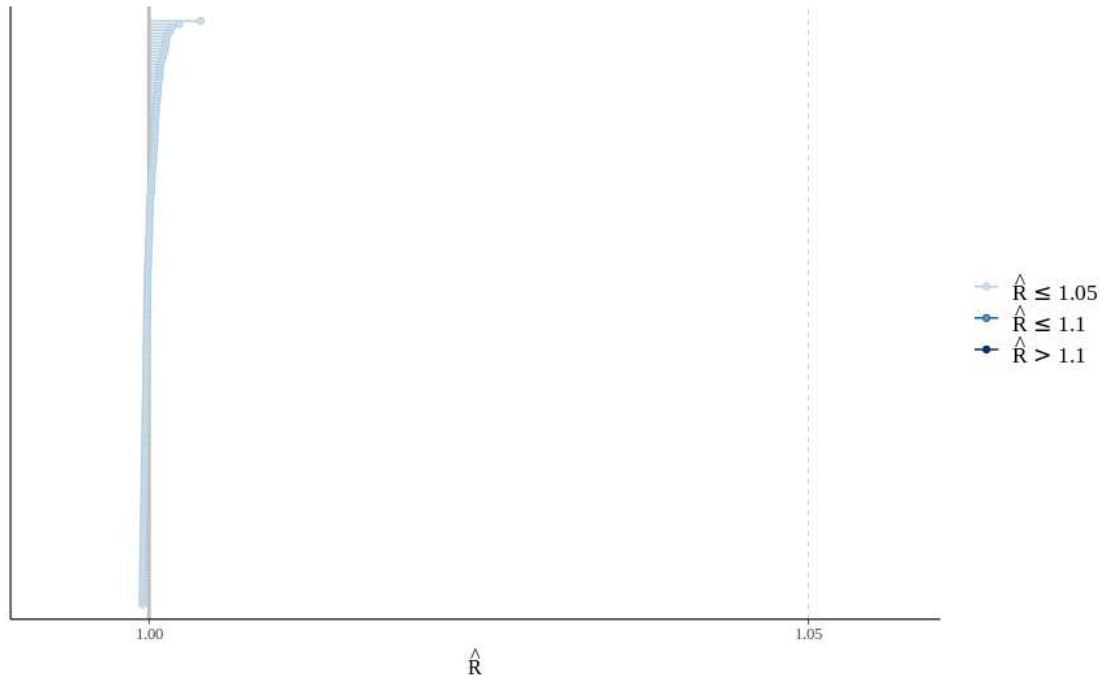

**Table 4** – Adjusted associations of patient, admission and process factors with days alive at home within 90 days of admission

|                                            | <b>Absolute<br/>median<br/>difference</b> | <b>LCrL</b> | <b>UCrL</b> |
|--------------------------------------------|-------------------------------------------|-------------|-------------|
| Age 60 to 69                               | -3.15                                     | -3.95       | -2.36       |
| Age 70 to 79                               | -12.59                                    | -13.40      | -11.77      |
| Age 80 to 89                               | -26.86                                    | -27.65      | -26.10      |
| Age 90+                                    | -37.92                                    | -38.81      | -37.04      |
| Frailty (mild)                             | -16.77                                    | -17.43      | -16.11      |
| Frailty (moderate)                         | -26.90                                    | -27.81      | -25.98      |
| Frailty (severe)                           | -28.94                                    | -30.43      | -27.38      |
| Multimorbidity                             | -0.98                                     | -1.54       | -0.43       |
| Multimorbidity+                            | 0.29                                      | -0.51       | 1.09        |
| Acute hospitalization<br>in previous year  | -1.38                                     | -1.97       | -0.78       |
| Dementia                                   | -19.71                                    | -20.41      | -19.02      |
| Male                                       | -1.35                                     | -1.83       | -0.88       |
| Rural Residence                            | 1.04                                      | 0.34        | 1.76        |
| Income quintile 2                          | 1.87                                      | 1.23        | 2.49        |
| Income quintile 3                          | 0.88                                      | 0.22        | 1.55        |
| Income quintile 4                          | 0.40                                      | -0.27       | 1.10        |
| Income quintile 5                          | 0.97                                      | 0.28        | 1.67        |
| Neuraxial anesthesia                       | 1.22                                      | 0.77        | 1.70        |
| Nerve block                                | -0.06                                     | -0.69       | 0.56        |
| Surgical wait (1-2<br>days)                | -0.87                                     | -1.37       | -0.36       |
| Surgical wait (3+<br>days)                 | -6.60                                     | -7.57       | -5.62       |
| Complication                               | -12.16                                    | -12.74      | -11.60      |
| ICU Admission                              | -10.12                                    | -10.96      | -9.30       |
| Hospital hip fracture<br>volume quintile 2 | -1.11                                     | -5.09       | 3.02        |
| Hospital hip fracture<br>volume quintile 3 | -1.92                                     | -5.63       | 2.05        |
| Hospital hip fracture<br>volume quintile 4 | -3.87                                     | -7.72       | 0.11        |
| Hospital hip fracture<br>volume quintile 5 | -3.67                                     | -7.41       | 0.34        |



**Table 5** - Adjusted associations of patient, admission and process factors with days alive at home within 90 days of admission using non-informative prior distributions

|                                            | <b>Absolute<br/>median<br/>difference</b> | <b>LCrL</b> | <b>UCrL</b> |
|--------------------------------------------|-------------------------------------------|-------------|-------------|
| Age 60 to 69                               | -2.92                                     | -3.71       | -2.15       |
| Age 70 to 79                               | -12.30                                    | -13.14      | -11.53      |
| Age 80 to 89                               | -26.52                                    | -27.26      | -25.78      |
| Age 90+                                    | -37.50                                    | -38.35      | -36.64      |
| Frailty (mild)                             | -16.79                                    | -17.44      | -16.15      |
| Frailty (moderate)                         | -26.96                                    | -27.87      | -26.03      |
| Frailty (severe)                           | -28.83                                    | -30.40      | -27.30      |
| Multimorbidity                             | -1.04                                     | -1.61       | -0.50       |
| Multimorbidity+                            | 0.11                                      | -0.75       | 0.94        |
| Acute hospitalization<br>in previous year  | -1.35                                     | -1.95       | -0.76       |
| Dementia                                   | -19.73                                    | -20.43      | -19.03      |
| Male                                       | -0.85                                     | -1.27       | -0.49       |
| Rural Residence                            | 1.02                                      | 0.31        | 1.72        |
| Income quintile 2                          | 1.87                                      | 1.26        | 2.48        |
| Income quintile 3                          | 0.90                                      | 0.25        | 1.54        |
| Income quintile 4                          | 0.45                                      | -0.25       | 1.13        |
| Income quintile 5                          | 0.98                                      | 0.30        | 1.64        |
| Neuraxial anesthesia                       | 1.24                                      | 0.78        | 1.70        |
| Nerve block                                | -0.03                                     | -0.64       | 0.56        |
| Surgical wait (1-2<br>days)                | -0.89                                     | -1.39       | -0.38       |
| Surgical wait (3+<br>days)                 | -6.70                                     | -7.67       | -5.74       |
| Complication                               | -12.19                                    | -12.76      | -11.59      |
| ICU Admission                              | -10.23                                    | -11.04      | -9.40       |
| Hospital hip fracture<br>volume quintile 2 | -1.23                                     | -5.31       | 2.82        |
| Hospital hip fracture<br>volume quintile 3 | -1.99                                     | -5.87       | 1.95        |
| Hospital hip fracture<br>volume quintile 4 | -3.98                                     | -7.81       | -0.04       |
| Hospital hip fracture<br>volume quintile 5 | -3.84                                     | -7.72       | 0.10        |

**Table 6** - Adjusted associations of patient, admission and process factors with days alive at home within 90 days of admission where days in institution are counted as home for individuals institutionalized pre-fracture

|                                            | <b>Absolute<br/>median<br/>difference</b> | <b>LCrL</b> | <b>UCrL</b> |
|--------------------------------------------|-------------------------------------------|-------------|-------------|
| Age 60 to 69                               | -3.15                                     | -3.93       | -2.39       |
| Age 70 to 79                               | -9.70                                     | -10.44      | -8.93       |
| Age 80 to 89                               | -17.59                                    | -18.32      | -16.90      |
| Age 90+                                    | -24.24                                    | -25.06      | -23.42      |
| Frailty (mild)                             | -1.70                                     | -2.18       | -1.21       |
| Frailty (moderate)                         | -1.14                                     | -1.97       | -0.32       |
| Frailty (severe)                           | -2.36                                     | -4.27       | -0.52       |
| Multimorbidity                             | -2.71                                     | -3.21       | -2.23       |
| Multimorbidity+                            | -9.26                                     | -10.02      | -8.51       |
| Acute hospitalization<br>in previous year  | -3.64                                     | -4.23       | -3.05       |
| Dementia                                   | 8.86                                      | 8.18        | 9.53        |
| Male                                       | -1.44                                     | -1.98       | -0.97       |
| Rural Residence                            | 1.63                                      | 0.95        | 2.30        |
| Income quintile 2                          | 0.62                                      | 0.01        | 1.20        |
| Income quintile 3                          | 0.58                                      | -0.03       | 1.19        |
| Income quintile 4                          | 1.52                                      | 0.89        | 2.17        |
| Income quintile 5                          | 1.78                                      | 1.14        | 2.43        |
| Neuraxial anesthesia                       | 0.99                                      | 0.55        | 1.43        |
| Nerve block                                | -0.66                                     | -1.22       | -0.09       |
| Surgical wait (1-2<br>days)                | -2.07                                     | -2.56       | -1.61       |
| Surgical wait (3+<br>days)                 | -10.07                                    | -11.02      | -9.12       |
| Complication                               | -20.00                                    | -20.63      | -19.38      |
| ICU Admission                              | -16.24                                    | -17.21      | -15.26      |
| Hospital hip fracture<br>volume quintile 2 | -0.36                                     | -3.90       | 3.24        |
| Hospital hip fracture<br>volume quintile 3 | -2.54                                     | -5.99       | 1.09        |
| Hospital hip fracture<br>volume quintile 4 | -3.99                                     | -7.49       | -0.40       |
| Hospital hip fracture<br>volume quintile 5 | -3.92                                     | -7.39       | -0.37       |

**Table 7** - Minimally important difference estimates for days alive at home within 90 days of admission using the 5% range criterion as a distribution-based input

| Group                                | Distribution estimates |              | Anchor estimates |              | Average |
|--------------------------------------|------------------------|--------------|------------------|--------------|---------|
|                                      | SD x 0.3               | Range x 0.05 | ICU Admission    | Complication |         |
| Overall                              | 11                     | 4            | 10               | 12           | 9       |
| <i>Subgroups</i>                     |                        |              |                  |              |         |
| Males                                | 10                     | 4            | 10               | 14           | 10      |
| Females                              | 11                     | 4            | 10               | 11           | 9       |
| No frailty                           | 10                     | 4            | 17               | 18           | 12      |
| With Frailty                         | 10                     | 4            | 10               | 9            | 8       |
| Pre-fracture institutionalization    | 6                      | 4            | 1                | 1            | 3       |
| No pre-fracture institutionalization | 10                     | 4            | 13               | 20           | 12      |
| Surgical fixation                    | 11                     | 4            | 16               | 14           | 11      |
| No surgical fixation                 | 10                     | 4            | 10               | 12           | 9       |

Frailty: frailty index >0.21; ICU: intensive care unit; SD: standard deviation

**Table 8** – Minimally important difference estimates for days alive at home within 90 days of admission where days in institution are counted as home for individuals institutionalized pre-fracture

| Distribution estimates |              | Anchor estimates |              | Average |
|------------------------|--------------|------------------|--------------|---------|
| SD x 0.3               | Range x 0.05 | ICU Admission    | Complication |         |
| 10                     | 9            | 16               | 20           | 14      |
